# Supplementary material
Source: PubMed Central journal article supplement (PMC6503511)
Supplement: jamapediatr-173-e190081-s001.pdf [file jamapediatr-173-e190081-s001.pdf]

## Supplementary Online Content

Parikh SH, Satwani P, Ahn KW, et al. Survival Trends in Infants Undergoing Allogeneic Hematopoietic Cell Transplant. *JAMA Pediatr*. Published online March 18, 2019. doi: 10.1001/jamapediatrics.2019.0081

**eTable 1.** Detailed baseline, demographic, patient-related and transplant-related characteristics of infants receiving first allogeneic hematopoietic cell transplant

**eTable 2.** Baseline demographics of infants who received allogeneic transplants reported to the CIBMTR on Comprehensive Report Form between 2008-2014

**eTable 3.** Univariable analysis of outcomes by year of transplant group in Comprehensive Report Form patients between 2008-2014

**eTable 4.** Multivariable analysis of overall survival among malignant cohort

**eTable 5.** Multivariable analysis of overall survival among non-malignant cohort, including donor type

**eTable 6.** Multivariable analysis of overall survival among non-malignant cohort, including graft source

**eTable 7.** Multivariable analysis of transplant-related mortality among malignant cohort

**eTable 8.** Multivariable analysis of relapse among malignant cohort

**eTable 9.** Multivariable analysis of disease-free survival among malignant cohort

**eTable 10.** Causes of death

**eTable 11.** Breakdown of primary disease as cause of death

**eTable 12.** Breakdown of organ failure as cause of death

**eTable 13.** Breakdown of “other” as cause of death

**eTable 14.** Cause of death in malignant vs. non-malignant split by year of transplant

**eTable 15.** Multivariable analysis of sinusoidal obstruction syndrome in non-malignant cohort (including donor type)

**eTable 16.** Multivariable analysis of sinusoidal obstruction syndrome in non-malignant cohort (including graft source)

**eTable 17.** Multivariable analysis of idiopathic pneumonia syndrome in malignant cohort

**eTable 18.** Multivariable analysis of idiopathic pneumonia syndrome in non-malignant cohort

**eTable 1. Detailed baseline, demographic, patient-related and transplant-related characteristics of infants receiving first allogeneic hematopoietic cell transplant**

| Characteristics of patients | Malignant<br>N (%) |           |            | Non-Malignant<br>N (%) |            |            | All<br>N (%) |
|-----------------------------|--------------------|-----------|------------|------------------------|------------|------------|--------------|
|                             | 2000-2004          | 2005-2009 | 2010-2014  | 2000-2004              | 2005-2009  | 2010-2014  |              |
| <b>Time period</b>          |                    |           |            |                        |            |            |              |
| Number of patients          | 199                | 161       | 112        | 577                    | 699        | 750        | 2498         |
| Number of centers           | 88                 | 77        | 61         | 118                    | 121        | 102        | 181          |
| <b>Age</b>                  |                    |           |            |                        |            |            |              |
| Median (range), months      | 9(<1 - 12)         | 9(2 - 12) | 9(<1 - 12) | 6(1 - 12)              | 7(<1 - 12) | 6(<1 - 12) | 7(<1 - 12)   |
| ≤ 6 months                  | 26 (13)            | 23 (14)   | 12 (11)    | 255 (44)               | 294 (42)   | 363 (48)   | 973 (39)     |
| 6-12 months                 | 173 (87)           | 138 (86)  | 100 (89)   | 322 (56)               | 405 (58)   | 387 (52)   | 1525 (61)    |
| <b>Sex</b>                  |                    |           |            |                        |            |            |              |
| Male                        | 99 (50)            | 86 (53)   | 55 (49)    | 340 (59)               | 437 (63)   | 477 (64)   | 1494 (60)    |
| Female                      | 100 (50)           | 75 (47)   | 57 (51)    | 237 (41)               | 262 (37)   | 273 (36)   | 1004 (40)    |
| <b>Race/Ethnicity</b>       |                    |           |            |                        |            |            |              |
| White                       | 138 (69)           | 120 (75)  | 77 (69)    | 384 (67)               | 472 (68)   | 439 (59)   | 1630 (65)    |
| African-American            | 9 (5)              | 11 (7)    | 5 (4)      | 29 (5)                 | 52 (7)     | 75 (10)    | 181 (7)      |
| Asian                       | 8 (4)              | 7 (4)     | 10 (9)     | 27 (5)                 | 44 (6)     | 34 (5)     | 130 (5)      |
| Pacific Islander            | 0                  | 2 (1)     | 0          | 0                      | 1 (<1)     | 2 (<1)     | 5 (<1)       |
| Native American             | 2 (1)              | 0         | 2 (2)      | 3 (<1)                 | 13 (2)     | 13 (2)     | 33 (1)       |
| Other <sup>a</sup>          | 21 (11)            | 9 (6)     | 0          | 54 (9)                 | 64 (9)     | 0          | 148 (6)      |
| Not reported                | 21 (11)            | 12 (7)    | 18 (16)    | 80 (14)                | 53 (8)     | 187 (25)   | 371 (15)     |
| <b>Transplant region</b>    |                    |           |            |                        |            |            |              |
| US                          | 124 (62)           | 114 (71)  | 75 (67)    | 297 (51)               | 437 (63)   | 492 (66)   | 1539 (62)    |
| Canada                      | 11 (6)             | 11 (7)    | 3 (3)      | 22 (4)                 | 32 (5)     | 31 (4)     | 110 (4)      |
| Europe                      | 34 (17)            | 9 (6)     | 9 (8)      | 120 (21)               | 54 (8)     | 27 (4)     | 253 (10)     |

<sup>a</sup> Other races/ethnicities: Hispanic unspecified (n=47), Mexican SW U.S. Hispanic (n=10), South or Central American Hispanic (n=1), other race not specified (n=90)

| Characteristics of patients                           | Malignant<br>N (%) |           |           | Non-Malignant<br>N (%) |           |           | All<br>N (%) |
|-------------------------------------------------------|--------------------|-----------|-----------|------------------------|-----------|-----------|--------------|
|                                                       | 2000-2004          | 2005-2009 | 2010-2014 | 2000-2004              | 2005-2009 | 2010-2014 |              |
| <b>Time period</b>                                    |                    |           |           |                        |           |           |              |
| Asia                                                  | 6 (3)              | 3 (2)     | 3 (3)     | 6 (1)                  | 8 (1)     | 4 (<1)    | 30 (1)       |
| Australia/New Zealand                                 | 9 (5)              | 12 (7)    | 8 (7)     | 19 (3)                 | 28 (4)    | 37 (5)    | 113 (5)      |
| Mideast/Africa                                        | 6 (3)              | 10 (6)    | 9 (8)     | 78 (14)                | 123 (18)  | 149 (20)  | 375 (15)     |
| Central/South America                                 | 9 (5)              | 2 (1)     | 5 (4)     | 35 (6)                 | 17 (2)    | 10 (1)    | 78 (3)       |
| <b>Ethnic groups</b>                                  |                    |           |           |                        |           |           |              |
| White, non-Hispanic                                   | 132 (66)           | 100 (62)  | 61 (54)   | 363 (63)               | 406 (58)  | 344 (46)  | 1406 (56)    |
| African-American, non-Hispanic                        | 9 (5)              | 11 (7)    | 5 (4)     | 29 (5)                 | 51 (7)    | 67 (9)    | 172 (7)      |
| Asian, non-Hispanic                                   | 8 (4)              | 7 (4)     | 9 (8)     | 27 (5)                 | 40 (6)    | 34 (5)    | 125 (5)      |
| Pacific islander, non-Hispanic                        | 0                  | 2 (1)     | 0         | 0                      | 1 (<1)    | 2 (<1)    | 5 (<1)       |
| Native American, non-Hispanic                         | 1 (<1)             | 0         | 2 (2)     | 3 (<1)                 | 12 (2)    | 12 (2)    | 30 (1)       |
| Hispanic, white                                       | 6 (3)              | 20 (12)   | 16 (14)   | 21 (4)                 | 66 (9)    | 95 (13)   | 224 (9)      |
| Hispanic, African-American                            | 0                  | 0         | 0         | 0                      | 1 (<1)    | 8 (1)     | 9 (<1)       |
| Hispanic, Asian                                       | 0                  | 0         | 1 (<1)    | 0                      | 4 (<1)    | 0         | 5 (<1)       |
| Hispanic, Native American                             | 1 (<1)             | 0         | 0         | 0                      | 1 (<1)    | 1 (<1)    | 3 (<1)       |
| Hispanic, race not reported                           | 14 (7)             | 3 (2)     | 0         | 34 (6)                 | 11 (2)    | 0         | 62 (2)       |
| Other                                                 | 7 (4)              | 6 (4)     | 0         | 20 (3)                 | 53 (8)    | 0         | 86 (3)       |
| Not reported                                          | 21 (11)            | 12 (7)    | 18 (16)   | 80 (14)                | 53 (8)    | 187 (25)  | 371 (15)     |
| <b>Malignant disease</b>                              |                    |           |           |                        |           |           |              |
| Acute myelogenous leukemia                            | 73 (37)            | 55 (34)   | 37 (33)   | N/A                    | N/A       | N/A       | 165 (35)     |
| Acute lymphoblastic leukemia and other acute leukemia | 81 (41)            | 58 (36)   | 43 (38)   | N/A                    | N/A       | N/A       | 182 (39)     |
| MDS/MPD                                               | 40 (20)            | 35 (22)   | 31 (28)   | N/A                    | N/A       | N/A       | 106 (22)     |
| Other leukemia, CML, other malignancy                 | 5 (3)              | 13 (8)    | 1 (1)     | N/A                    | N/A       | N/A       | 19 (4)       |
| <b>Non-malignant disease</b>                          |                    |           |           |                        |           |           |              |
| Inherited bone marrow failure                         | N/A                | N/A       | N/A       | 21 (4)                 | 12 (2)    | 22 (3)    | 55 (3)       |
| Hemoglobinopathies                                    | N/A                | N/A       | N/A       | 5 (<1)                 | 14 (2)    | 6 (<1)    | 25 (1)       |
| Severe combined immunodeficiency (SCID)               | N/A                | N/A       | N/A       | 221 (38)               | 290 (41)  | 323 (43)  | 834 (41)     |

| Characteristics of patients                              | Malignant<br>N (%) |           |           | Non-Malignant<br>N (%) |           |           | All<br>N (%) |
|----------------------------------------------------------|--------------------|-----------|-----------|------------------------|-----------|-----------|--------------|
|                                                          | 2000-2004          | 2005-2009 | 2010-2014 | 2000-2004              | 2005-2009 | 2010-2014 |              |
| <b>Time period</b>                                       |                    |           |           |                        |           |           |              |
| Non-SCID                                                 | N/A                | N/A       | N/A       | 103 (18)               | 126 (18)  | 149 (20)  | 378 (19)     |
| Osteopetrosis                                            | N/A                | N/A       | N/A       | 62 (11)                | 45 (6)    | 36 (5)    | 143 (7)      |
| Mucopolysaccharidosis/other storage disorder             | N/A                | N/A       | N/A       | 81 (14)                | 77 (11)   | 54 (7)    | 212 (10)     |
| Histiocytic disorder                                     | N/A                | N/A       | N/A       | 82 (14)                | 132 (19)  | 146 (19)  | 360 (18)     |
| Other non-malignant                                      | N/A                | N/A       | N/A       | 2 (<1)                 | 3 (<1)    | 14 (2)    | 19 (<1)      |
| <b>Disease status<sup>b</sup> for subset<sup>c</sup></b> |                    |           |           |                        |           |           |              |
| Early disease                                            | 107 (54)           | 82 (51)   | 58 (52)   | N/A                    | N/A       | N/A       | 247 (10)     |
| Intermediate disease                                     | 25 (13)            | 18 (11)   | 16 (14)   | N/A                    | N/A       | N/A       | 59 (2)       |
| Advanced disease                                         | 25 (13)            | 13 (8)    | 8 (7)     | N/A                    | N/A       | N/A       | 46 (2)       |
| Not reported                                             | 11 (6)             | 8 (5)     | 3 (3)     | N/A                    | N/A       | N/A       | 22 (<1)      |
| N/A, MDS/MPD                                             | 26 (13)            | 27 (17)   | 26 (23)   | N/A                    | N/A       | N/A       | 79 (3)       |
| Unclassified, other malignant disease                    | 5 (3)              | 13 (8)    | 1 (<1)    | N/A                    | N/A       | N/A       | 19 (<1)      |
| <b>Donor type</b>                                        |                    |           |           |                        |           |           |              |
| UCB (HLA 6/6)                                            | 10 (5)             | 13 (8)    | 6 (5)     | 18 (3)                 | 66 (9)    | 71 (9)    | 184 (7)      |
| UCB (HLA 5/6)                                            | 9 (5)              | 37 (23)   | 23 (21)   | 50 (9)                 | 96 (14)   | 137 (18)  | 352 (14)     |
| UCB (HLA ≤ 4/6)                                          | 12 (6)             | 11 (7)    | 4 (4)     | 25 (4)                 | 54 (8)    | 39 (5)    | 145 (6)      |
| UCB (HLA match not reported)                             | 33 (17)            | 13 (8)    | 7 (6)     | 102 (18)               | 89 (13)   | 36 (5)    | 280 (11)     |
| HLA-identical sibling                                    | 64 (32)            | 44 (27)   | 29 (26)   | 136 (24)               | 138 (20)  | 170 (23)  | 581 (23)     |
| Other relative <sup>d</sup>                              | 12 (6)             | 10 (6)    | 7 (6)     | 126 (22)               | 119 (17)  | 104 (14)  | 378 (15)     |
| 8/8 HLA-matched unrelated                                | 17 (9)             | 22 (14)   | 20 (18)   | 36 (6)                 | 76 (11)   | 135 (18)  | 306 (12)     |
| 7/8 HLA partially matched unrelated                      | 15 (8)             | 6 (4)     | 8 (7)     | 24 (4)                 | 31 (4)    | 38 (5)    | 122 (5)      |
| ≤ 6/8 HLA mis-matched unrelated                          | 3 (2)              | 1 (<1)    | 0         | 12 (2)                 | 7 (1)     | 3 (<1)    | 26 (1)       |

<sup>b</sup> Disease status was defined as early, acute leukemia (AL) in first complete remission (CR), myelodysplastic syndrome (MDS) without excess of blasts; as intermediate, AL in second or greater CR; and advanced, AL not in remission and MDS with excess blasts.

<sup>c</sup> Subset includes: AML/ALL/other acute leukemia/MDS

<sup>d</sup> Other relative includes haploidentical donors

| Characteristics of patients             | Malignant<br>N (%) |           |           | Non-Malignant<br>N (%) |           |           | All<br>N (%) |
|-----------------------------------------|--------------------|-----------|-----------|------------------------|-----------|-----------|--------------|
|                                         | 2000-2004          | 2005-2009 | 2010-2014 | 2000-2004              | 2005-2009 | 2010-2014 |              |
| <b>Time period</b>                      |                    |           |           |                        |           |           |              |
| Unrelated, HLA-match not reported       | 24 (12)            | 4 (2)     | 8 (7)     | 44 (8)                 | 22 (3)    | 17 (2)    | 119 (5)      |
| Not reported                            | 0                  | 0         | 0         | 4 (<1)                 | 1 (<1)    | 0         | 5 (<1)       |
| <b>Graft source</b>                     |                    |           |           |                        |           |           |              |
| Bone marrow                             | 106 (53)           | 62 (39)   | 59 (53)   | 269 (47)               | 309 (44)  | 407 (54)  | 1212 (49)    |
| Peripheral blood                        | 29 (15)            | 25 (16)   | 13 (12)   | 113 (20)               | 85 (12)   | 60 (8)    | 325 (13)     |
| Umbilical cord blood                    | 64 (32)            | 74 (46)   | 40 (36)   | 195 (34)               | 305 (44)  | 283 (38)  | 961 (38)     |
| <b>Donor–recipient match, sex</b>       |                    |           |           |                        |           |           |              |
| Male–Male                               | 47 (24)            | 51 (32)   | 33 (29)   | 139 (24)               | 216 (31)  | 228 (30)  | 714 (29)     |
| Female–Male                             | 41 (21)            | 35 (22)   | 21 (19)   | 160 (28)               | 216 (31)  | 248 (33)  | 721 (29)     |
| Male–Female                             | 47 (24)            | 36 (22)   | 29 (26)   | 92 (16)                | 125 (18)  | 126 (17)  | 455 (18)     |
| Female–Female                           | 45 (23)            | 37 (23)   | 28 (25)   | 122 (21)               | 135 (19)  | 147 (20)  | 514 (21)     |
| Not reported                            | 19 (10)            | 2 (1)     | 1 (<1)    | 64 (11)                | 7 (1)     | 1 (<1)    | 94 (4)       |
| <b>ATG and Alemtuzumab use</b>          |                    |           |           |                        |           |           |              |
| ATG alone                               | 75 (38)            | 66 (41)   | 50 (45)   | 280 (49)               | 368 (53)  | 345 (46)  | 1184 (47)    |
| Alemtuzumab alone                       | 1 (<1)             | 4 (2)     | 0         | 6 (1)                  | 34 (5)    | 4 (<1)    | 49 (2)       |
| No ATG or Alemtuzumab                   | 123 (62)           | 91 (57)   | 62 (55)   | 291 (50)               | 297 (42)  | 401 (53)  | 1265 (51)    |
| <b>Conditioning regimen intensity</b>   |                    |           |           |                        |           |           |              |
| MAC                                     | 163 (82)           | 153 (95)  | 107 (96)  | 431 (75)               | 492 (70)  | 454 (61)  | 1800 (72)    |
| RIC/NMA                                 | 2 (1)              | 2 (1)     | 5 (4)     | 76 (13)                | 164 (23)  | 190 (25)  | 439 (18)     |
| No conditioning                         | 0                  | 0         | 0         | 70 (12)                | 43 (6)    | 106 (14)  | 219 (9)      |
| Not reported                            | 34 (17)            | 6 (4)     | 0         | 0                      | 0         | 0         | 40 (2)       |
| <b>TBI used in conditioning regimen</b> |                    |           |           |                        |           |           |              |
| No                                      | 144 (72)           | 120 (75)  | 92 (82)   | 553 (96)               | 684 (98)  | 730 (97)  | 2323 (93)    |
| Yes                                     | 55 (28)            | 41 (25)   | 20 (18)   | 24 (4)                 | 15 (2)    | 20 (3)    | 175 (7)      |

| Characteristics of patients             | Malignant<br>N (%) |           |           | Non-Malignant<br>N (%) |           |           | All<br>N (%) |
|-----------------------------------------|--------------------|-----------|-----------|------------------------|-----------|-----------|--------------|
|                                         | 2000-2004          | 2005-2009 | 2010-2014 | 2000-2004              | 2005-2009 | 2010-2014 |              |
| <b>Time period</b>                      |                    |           |           |                        |           |           |              |
| <b>TBI and conditioning intensity</b>   |                    |           |           |                        |           |           |              |
| MAC + TBI                               | 55 (28)            | 41 (25)   | 20 (18)   | 24 (4)                 | 15 (2)    | 20 (3)    | 175 (7)      |
| MAC without TBI                         | 108 (54)           | 112 (70)  | 87 (78)   | 407 (71)               | 477 (68)  | 434 (58)  | 1625 (65)    |
| RIC without TBI                         | 2 (1)              | 2 (1)     | 5 (4)     | 76 (13)                | 164 (23)  | 190 (25)  | 439 (18)     |
| Not reported or no conditioning         | 34 (17)            | 6 (4)     | 0         | 70 (12)                | 43 (6)    | 106 (14)  | 259 (10)     |
| <b>GVHD prophylaxis</b>                 |                    |           |           |                        |           |           |              |
| Ex vivo T-cell depletion                | 1 (<1)             | 3 (2)     | 1 (<1)    | 36 (6)                 | 31 (4)    | 35 (5)    | 107 (4)      |
| CNI regimens <sup>e</sup>               | 144 (72)           | 145 (90)  | 105 (94)  | 373 (65)               | 550 (79)  | 616 (82)  | 1933 (77)    |
| Ex vivo T-cell depletion + CNI          | 8 (4)              | 3 (2)     | 1 (<1)    | 35 (6)                 | 24 (3)    | 21 (3)    | 92 (4)       |
| Others                                  | 5 (3)              | 2 (1)     | 5 (6)     | 13 (2)                 | 15 (2)    | 14 (2)    | 54 (2)       |
| Not reported                            | 41 (21)            | 8 (5)     | 0         | 120 (21)               | 79 (11)   | 64 (9)    | 312 (12)     |
| <b>Median follow-up, range (months)</b> | 122(3-173)         | 74(3-125) | 35(6-63)  | 119(3-193)             | 73(3-127) | 34(3-76)  | 60(3-193)    |

Abbreviations: ATG, anti-thymocyte globulin; CNI, calcineurin inhibitor; HLA, human leukocyte antigen; MAC, myeloablative conditioning; MDS/MPD, myelodysplastic syndrome/myeloproliferative disorder; N/A, not applicable; RIC/NMA, reduced-intensity/nonmyeloablative conditioning; SCID, severe combined immunodeficiency; TBI, total body irradiation; UCB, umbilical cord blood

<sup>e</sup> CNI regimens: ALL CNI regimens including MMF or MTX

**eTable 2. Baseline demographics of infants who received allogeneic transplants reported to the CIBMTR on Comprehensive Report Form between 2008-2014**

| <b>Characteristics of patients</b> | <b>N (%)</b> |
|------------------------------------|--------------|
| Number of patients                 | 641          |
| Number of centers                  | 92           |
| <b>Age</b>                         |              |
| Median (range), months             | 6 (< 1 - 12) |
| ≤ 6 months                         | 294 (46)     |
| 6-12 months                        | 347 (54)     |
| <b>Sex</b>                         |              |
| Male                               | 393 (61)     |
| Female                             | 248 (39)     |
| <b>Race</b>                        |              |
| White                              | 452 (71)     |
| African-American                   | 68 (11)      |
| Asian                              | 38 (6)       |
| Pacific Islander                   | 4 (<1)       |
| Native American                    | 17 (3)       |
| Not reported                       | 62 (10)      |
| <b>Ethnic groups</b>               |              |
| Caucasian, non-Hispanic            | 354 (55)     |
| African-American, non-Hispanic     | 61 (10)      |
| Asian, non-Hispanic                | 36 (6)       |
| Pacific Islander, non-Hispanic     | 4 (<1)       |
| Native American, non-Hispanic      | 16 (2)       |
| Hispanic, White                    | 98 (15)      |
| Hispanic, African-American         | 7 (1)        |
| Hispanic, Asian                    | 2 (<1)       |

| <b>Characteristics of patients</b>                                     | <b>N (%)</b> |
|------------------------------------------------------------------------|--------------|
| Hispanic, Native American                                              | 1 (<1)       |
| Not reported                                                           | 62 (10)      |
| <b>Malignant disease</b>                                               |              |
| Acute myelogenous leukemia                                             | 31 (36)      |
| Acute lymphoblastic leukemia                                           | 22 (26)      |
| Other leukemia                                                         | 2 (2)        |
| Myelodysplastic syndrome/myeloproliferative disorder                   | 26 (31)      |
| Other acute leukemia                                                   | 4 (5)        |
| <b>Non-malignant disease</b>                                           |              |
| Acquired/Inherited bone marrow failure                                 | 10 (2)       |
| Hemoglobinopathies                                                     | 7 (1)        |
| SCID                                                                   | 274 (49)     |
| Non-SCID                                                               | 85 (15)      |
| Osteopetrosis                                                          | 32 (6)       |
| Mucopolysaccharidosis and other storage disorder                       | 57 (10)      |
| Histiocytic disorder                                                   | 85 (15)      |
| Others                                                                 | 6 (1)        |
| <b>Disease status<sup>a</sup> for AML/ALL/other acute leukemia/MDS</b> |              |
| Early disease                                                          | 42 (7)       |
| Intermediate disease                                                   | 11 (2)       |
| Advanced disease                                                       | 7 (1)        |
| Not reported                                                           | 3 (<1)       |
| N/A, MDS                                                               | 20 (3)       |
| Unclassified, other malignant disease                                  | 2 (<1)       |
| N/A, non-malignant disease                                             | 556 (87)     |

<sup>a</sup> Disease status was defined as early, acute leukemia (AL) in first complete remission (CR), myelodysplastic syndrome (MDS) without excess of blasts; as intermediate, AL in second or greater CR; and advanced, AL not in remission and MDS with excess blasts.

| <b>Characteristics of patients</b>                     | <b>N (%)</b> |
|--------------------------------------------------------|--------------|
| <b>Hematopoietic cell transplant comorbidity index</b> |              |
| 0                                                      | 459 (72)     |
| 1                                                      | 65 (10)      |
| 2                                                      | 11 (2)       |
| 3+                                                     | 55 (9)       |
| Not reported                                           | 50 (8)       |
| <b>History of mechanical ventilation</b>               |              |
| No                                                     | 473 (74)     |
| Yes                                                    | 114 (18)     |
| <b>Donor type</b>                                      |              |
| UCB (HLA 6/6)                                          | 101 (16)     |
| UCB (HLA 5/6)                                          | 199 (31)     |
| UCB (HLA $\leq$ 4/6)                                   | 68 (11)      |
| UCB (HLA match unknown)                                | 23 (4)       |
| HLA-identical sibling                                  | 70 (11)      |
| HLA-matched/mismatched other relative                  | 66 (10)      |
| HLA-matched unrelated (HLA 8/8 URD)                    | 85 (13)      |
| HLA partially matched unrelated (HLA 7/8 URD)          | 21 (3)       |
| HLA mismatched unrelated (HLA 6/8 URD)                 | 3 (<1)       |
| Unrelated, HLA match unknown                           | 5 (<1)       |
| <b>Graft source</b>                                    |              |
| Bone marrow                                            | 201 (31)     |
| Peripheral blood                                       | 49 (8)       |
| Umbilical cord blood                                   | 391 (61)     |
| <b>Donor–recipient match, sex</b>                      |              |
| Male–Male                                              | 189 (29)     |
| Female–Male                                            | 203 (32)     |
| Male–Female                                            | 115 (18)     |

| <b>Characteristics of patients</b>             | <b>N (%)</b> |
|------------------------------------------------|--------------|
| Female–Female                                  | 133 (21)     |
| Not reported                                   | 1 (<1)       |
| <b>ATG and Campath use</b>                     |              |
| ATG alone                                      | 366 (57)     |
| Alemtuzumab alone                              | 3 (<1)       |
| No ATG or alemtuzumab                          | 272 (42)     |
| <b>Conditioning regimen intensity</b>          |              |
| MAC                                            | 447 (70)     |
| RIC/NMA                                        | 138 (22)     |
| No conditioning                                | 56 (9)       |
| <b>GVHD prophylaxis</b>                        |              |
| Ex vivo T-cell depletion                       | 30 (5)       |
| CNI (all CNI regimens including MMF, MTX etc.) | 564 (88)     |
| Ex vivo T-cell depletion + CNI                 | 20 (3)       |
| Others                                         | 9 (1)        |
| Not reported                                   | 18 (3)       |
| <b>Year of transplant</b>                      |              |
| 2005-2009                                      | 244 (38)     |
| 2010-2014                                      | 397 (62)     |
| Median follow-up of survivors, range, months   | 47 (6 - 97)  |

Abbreviations: ALL, acute lymphoblastic leukemia; AML, acute myelogenous leukemia; ATG, anti-thymocyte globulin; CML, chronic myelogenous leukemia; CNI, calcineurin inhibitor; HCT-CI, hematopoietic cell transplant comorbidity index; HLA, human leukocyte antigen; MAC, myeloablative conditioning; MDS/MPD, myelodysplastic syndrome/myeloproliferative disorder; MMF, mycophenolate mofetil; MTX, methotrexate; N/A, not applicable; RIC/NMA, reduced-intensity/nonmyeloablative conditioning; SCID, severe combined immunodeficiency; TBI, total body irradiation; UCB, umbilical cord blood; URD, unrelated donor

**eTable 3. Univariable analysis of outcomes by year of transplant group in Comprehensive Report Form patients between 2008-2014**

| <b>Outcomes</b>                                  | <b>N Eval</b> | <b>Prob (95% CI)</b> |
|--------------------------------------------------|---------------|----------------------|
| Idiopathic pneumonia syndrome (IPS)              | 639           |                      |
| 100-day                                          |               | 5 (4-7)%             |
| 1-year                                           |               | 7 (5-9)%             |
| Sinusoidal obstruction syndrome (SOS)            | 639           |                      |
| 100-day                                          |               | 16 (13-19)%          |
| 1-year                                           |               | 16 (13-19)%          |
| Neutrophil engraftment                           | 635           |                      |
| 100-day                                          |               | 87 (84-90)%          |
| Platelet engraftment                             | 626           |                      |
| 100-day                                          |               | 82 (79-85)%          |
| Grade 2-4 acute graft-versus-host disease (GVHD) | 640           |                      |
| 100-day                                          |               | 21 (18-24)%          |
| Grade 3-4 acute GVHD                             | 640           |                      |
| 100-day                                          |               | 8 (6-10)%            |
| Chronic GVHD                                     | 632           |                      |
| 1-year                                           |               | 17 (14-20)%          |
| 3-year                                           |               | 19 (16-22)%          |
| Overall survival for malignant disease           | 85            |                      |
| 1-year                                           |               | 67 (57-77)%          |
| 3-year                                           |               | 65 (54-74)%          |
| Overall survival for non-malignant disease       | 556           |                      |
| 1-year                                           |               | 78 (74-81)%          |
| 3-year                                           |               | 73 (69-76)%          |

**eTable 4. Multivariable analysis of overall survival among malignant cohort**

|                                                                               | HR   | 95% CI<br>Lower<br>Limit | 95% CI<br>Upper<br>Limit | P value | Overall<br>P value | N   |
|-------------------------------------------------------------------------------|------|--------------------------|--------------------------|---------|--------------------|-----|
| <b>Main effect: Year of transplant group</b>                                  |      |                          |                          |         | .57                |     |
| 2000-2004                                                                     | 1    |                          |                          |         |                    | 199 |
| 2005-2009                                                                     | 0.84 | 0.61                     | 1.17                     | .30     |                    | 161 |
| 2010-2014                                                                     | 0.90 | 0.63                     | 1.30                     | .58     |                    | 112 |
| <b>Age</b>                                                                    |      |                          |                          |         | .06                |     |
| < 6 months                                                                    | 1    |                          |                          |         |                    | 61  |
| > 6 months                                                                    | 0.69 | 0.47                     | 1.01                     | .06     |                    | 411 |
| <b>Malignant disease type</b>                                                 |      |                          |                          |         | .0012              |     |
| Acute myelogenous leukemia (AML)                                              | 1    |                          |                          |         |                    | 165 |
| Acute lymphoblastic leukemia (ALL) and other acute leukemias                  | 1.45 | 1.06                     | 1.98                     | .02     |                    | 182 |
| Myelodysplastic syndrome/myeloproliferative disorder (MDS/MPD)                | 0.79 | 0.52                     | 1.19                     | .26     |                    | 106 |
| Other leukemias, chronic myelogenous leukemia (CML), and other malignancies   | 0.32 | 0.10                     | 1.04                     | .06     |                    | 19  |
| <b>Contrast</b>                                                               |      |                          |                          |         |                    |     |
| 2005-2009 vs 2010-2014                                                        | 0.93 | 0.63                     | 1.38                     | .72     |                    |     |
| ALL and other acute leukemias vs MDS/MPD                                      | 1.84 | 1.24                     | 2.73                     | .002    |                    |     |
| ALL and other acute leukemias vs Other leukemias, CML, and other malignancies | 4.49 | 1.41                     | 14.31                    | .01     |                    |     |
| MDS/MPD vs Other leukemias, CML, and other malignancies                       | 2.44 | 0.74                     | 8.01                     | .14     |                    |     |

**eTable 5. Multivariable analysis of overall survival among non-malignant cohort, including donor type**

|                                                | HR   | 95% CI<br>Lower<br>Limit | 95% CI<br>Upper<br>Limit | P value | Overall<br>P value | N    |
|------------------------------------------------|------|--------------------------|--------------------------|---------|--------------------|------|
| <b>Main effect: Year of transplant group</b>   |      |                          |                          |         | .006               | 577  |
| 2000-2004                                      | 1    |                          |                          |         |                    | 699  |
| 2005-2009                                      | 0.77 | 0.63                     | 0.93                     | .007    |                    | 750  |
| 2010-2014                                      | 0.74 | 0.60                     | 0.91                     | .004    |                    |      |
| <b>Age</b>                                     |      |                          |                          |         | .91                |      |
| < 6 months                                     | 1    |                          |                          |         |                    | 912  |
| > 6 months                                     | 0.99 | 0.84                     | 1.17                     | .91     |                    | 1114 |
| <b>Donor Type</b>                              |      |                          |                          |         | < .0001            |      |
| HLA-identical sibling                          | 1    |                          |                          |         |                    | 444  |
| UCB (HLA 6/6)                                  | 1.38 | 0.95                     | 2.01                     | .09     |                    | 155  |
| UCB (HLA ≤ 5/6)                                | 2.03 | 1.55                     | 2.65                     | < .0001 |                    | 401  |
| HLA-matched/mismatched other relative          | 1.66 | 1.25                     | 2.21                     | .0004   |                    | 349  |
| HLA-matched unrelated (HLA 8/8 URD)            | 1.26 | 0.91                     | 1.76                     | 0.16    |                    | 247  |
| HLA-mismatched unrelated (HLA ≤ 7/8 URD)       | 1.55 | 1.06                     | 2.27                     | 0.02    |                    | 115  |
| Not reported                                   | 1.79 | 1.35                     | 2.38                     | < .0001 |                    | 315  |
| <b>Non-malignant disease type (≤ 4 months)</b> |      |                          |                          |         | < 0.0001           |      |
| SCID                                           | 1    |                          |                          |         |                    | 834  |
| Non-SCID                                       | 0.60 | 0.41                     | 0.86                     | .006    |                    | 378  |
| Osteopetrosis                                  | 2.07 | 1.48                     | 2.89                     | < .0001 |                    | 143  |
| Mucopolysaccharidosis                          | 0.99 | 0.69                     | 1.42                     | .95     |                    | 212  |
| Histiocytic disorder                           | 1.47 | 1.11                     | 1.95                     | .007    |                    | 360  |
| Others                                         | 1.68 | 1.08                     | 2.61                     | .02     |                    | 99   |

|                                                           | HR   | 95% CI<br>Lower<br>Limit | 95% CI<br>Upper<br>Limit | P value | Overall<br>P value | N   |
|-----------------------------------------------------------|------|--------------------------|--------------------------|---------|--------------------|-----|
| <b>Non-malignant disease type (&gt; 4 months)</b>         |      |                          |                          |         | < .0001            |     |
| SCID                                                      | 1    |                          |                          |         |                    | 147 |
| Non-SCID                                                  | 0.82 | 0.56                     | 1.22                     | .33     |                    | 43  |
| Osteopetrosis                                             | 2.05 | 1.28                     | 3.27                     | .003    |                    | 52  |
| Mucopolysaccharidosis                                     | 2.04 | 1.44                     | 2.89                     | < .0001 |                    | 42  |
| Histiocytic disorder                                      | 1.30 | 0.90                     | 1.87                     | .16     |                    | 84  |
| Others                                                    | 0.51 | 0.21                     | 1.27                     | .15     |                    | 24  |
| <b>Contrast</b>                                           |      |                          |                          |         |                    |     |
| 2005-2009 vs. 2010-2014                                   | 1.04 | 0.85                     | 1.27                     | .71     |                    |     |
| UCB (HLA 6/6) vs. UCB (HLA ≤ 5/6)                         | 0.68 | 0.48                     | 0.96                     | .03     |                    |     |
| UCB (HLA 6/6) vs. HLA-matched/mismatched other relative   | 0.83 | 0.57                     | 1.20                     | .32     |                    |     |
| UCB (HLA 6/6) vs. HLA (8/8 URD)                           | 1.09 | 0.73                     | 1.63                     | .66     |                    |     |
| UCB (HLA 6/6) vs. HLA (≤ 7/8 URD)                         | 0.89 | 0.57                     | 1.38                     | .61     |                    |     |
| UCB (HLA 6/6) vs. Not reported                            | 0.77 | 0.54                     | 1.11                     | .16     |                    |     |
| UCB (HLA ≤ 5/6) vs. HLA-matched/mismatched other relative | 1.22 | 0.94                     | 1.58                     | .13     |                    |     |
| UCB (HLA ≤ 5/6) vs. HLA (8/8 URD)                         | 1.61 | 1.19                     | 2.16                     | .002    |                    |     |
| UCB (HLA ≤ 5/6) vs. HLA (≤ 7/8 URD)                       | 1.31 | 0.92                     | 1.86                     | .13     |                    |     |
| UCB (HLA ≤ 5/6) vs. Not reported                          | 1.13 | 0.89                     | 1.45                     | .31     |                    |     |
| HLA-matched/mismatched other relative vs. HLA (8/8 URD)   | 1.32 | 0.95                     | 1.82                     | .10     |                    |     |
| HLA-matched/mismatched other relative vs. HLA (≤ 7/8 URD) | 1.07 | 0.74                     | 1.56                     | .71     |                    |     |
| HLA-matched/mismatched other relative vs. Not reported    | 0.93 | 0.71                     | 1.22                     | .60     |                    |     |
| HLA (8/8 URD) vs. HLA (≤ 7/8 URD)                         | 0.81 | 0.55                     | 1.22                     | .32     |                    |     |
| HLA (8/8 URD) vs. Not reported                            | 0.71 | 0.51                     | 0.97                     | .03     |                    |     |
| HLA (≤ 7/8 URD) vs. Not reported                          | 0.87 | 0.60                     | 1.24                     | .44     |                    |     |
| Non-SCID vs. Osteopetrosis (< 5 months)                   | 0.29 | 0.19                     | 0.44                     | < .0001 |                    |     |

|                                                             | HR   | 95% CI<br>Lower<br>Limit | 95% CI<br>Upper<br>Limit | P value | Overall<br>P value | N |
|-------------------------------------------------------------|------|--------------------------|--------------------------|---------|--------------------|---|
| Non-SCID vs. Mucopolysaccharidosis(< 5 months)              | 0.60 | 0.38                     | 0.95                     | .03     |                    |   |
| Non-SCID vs. Histiocytic disorder (< 5 months)              | 0.41 | 0.27                     | 0.60                     | < .0001 |                    |   |
| Non-SCID vs. Others (< 5 months)                            | 0.35 | 0.21                     | 0.59                     | < .0001 |                    |   |
| Osteopetrosis vs. Mucopolysaccharidosis(< 5 months)         | 2.10 | 1.37                     | 3.21                     | .0007   |                    |   |
| Osteopetrosis vs. Histiocytic disorder (< 5 months)         | 1.40 | 0.98                     | 2.02                     | .07     |                    |   |
| Osteopetrosis vs. Others (< 5 months)                       | 1.23 | 0.75                     | 2.02                     | .41     |                    |   |
| Mucopolysaccharidosis vs. Histiocytic disorder (< 5 months) | 0.67 | 0.46                     | 0.98                     | .04     |                    |   |
| Mucopolysaccharidosis vs. Others (< 5 months)               | 0.58 | 0.35                     | 0.98                     | .04     |                    |   |
| Histiocytic disorder vs. Others (< 5 months)                | 0.88 | 0.56                     | 1.38                     | .57     |                    |   |
| Non-SCID vs. Osteopetrosis (> 5 months)                     | 0.40 | 0.24                     | 0.68                     | .0008   |                    |   |
| Non-SCID vs. Mucopolysaccharidosis(> 5 months)              | 0.40 | 0.27                     | 0.62                     | < .0001 |                    |   |
| Non-SCID vs. Histiocytic disorder (> 5 months)              | 0.63 | 0.41                     | 0.98                     | .04     |                    |   |
| Non-SCID vs. Others (> 5 months)                            | 1.60 | 0.63                     | 4.08                     | .32     |                    |   |
| Osteopetrosis vs. Mucopolysaccharidosis(> 5 months)         | 1.00 | 0.61                     | 1.66                     | .99     |                    |   |
| Osteopetrosis vs. Histiocytic disorder (> 5 months)         | 1.58 | 0.94                     | 2.63                     | .08     |                    |   |
| Osteopetrosis vs. Others (> 5 months)                       | 3.98 | 1.50                     | 10.52                    | .005    |                    |   |
| Mucopolysaccharidosis vs. Histiocytic disorder (> 5 months) | 1.57 | 1.06                     | 2.33                     | .03     |                    |   |
| Mucopolysaccharidosis vs. Others (> 5 months)               | 3.96 | 1.58                     | 9.94                     | .003    |                    |   |
| Histiocytic disorder vs. Others (> 5 months)                | 2.53 | 1.00                     | 6.37                     | .05     |                    |   |

Abbreviations: HLA, human leukocyte antigen; N/A, not applicable; SCID, severe combined immunodeficiency; UCB, umbilical cord blood; URD, unrelated donor

**eTable 6. Multivariable analysis of overall survival among non-malignant cohort, including graft source**

|                                                   | HR   | 95% CI<br>Lower<br>Limit | 95% CI<br>Upper<br>Limit | P value | Overall<br>P value | N    |
|---------------------------------------------------|------|--------------------------|--------------------------|---------|--------------------|------|
| <b>Main effect: Year of transplant group</b>      |      |                          |                          |         | .004               | 577  |
| 2000-2004                                         | 1    |                          |                          |         |                    | 699  |
| 2005-2009                                         | 0.76 | 0.63                     | 0.92                     | .006    |                    | 750  |
| 2010-2014                                         | 0.74 | 0.60                     | 0.90                     | .003    |                    |      |
| <b>Age</b>                                        |      |                          |                          |         | .97                |      |
| < 6 months                                        | 1    |                          |                          |         |                    | 912  |
| > 6 months                                        | 1.00 | 0.85                     | 1.17                     | .97     |                    | 1114 |
| <b>Graft Source</b>                               |      |                          |                          |         | < .0001            |      |
| Bone Marrow                                       | 1    |                          |                          |         |                    | 985  |
| Peripheral blood                                  | 1.50 | 1.17                     | 1.91                     | .001    |                    | 258  |
| Umbilical cord blood                              | 1.59 | 1.33                     | 1.90                     | < .0001 |                    | 783  |
| <b>Non-malignant disease type (≤ 4 months)</b>    |      |                          |                          |         | < .0001            |      |
| Severe combined immunodeficiency (SCID)           | 1    |                          |                          |         |                    | 834  |
| Non-SCID                                          | 0.58 | 0.40                     | 0.84                     | .004    |                    | 378  |
| Osteopetrosis                                     | 2.03 | 1.46                     | 2.84                     | < .0001 |                    | 143  |
| Mucopolysaccharidosis                             | 0.97 | 0.67                     | 1.39                     | .86     |                    | 212  |
| Histiocytic disorder                              | 1.48 | 1.12                     | 1.95                     | .006    |                    | 360  |
| Others                                            | 1.67 | 1.08                     | 2.59                     | .02     |                    | 99   |
| <b>Non-malignant disease type (&gt; 4 months)</b> |      |                          |                          |         | < .0001            |      |
| SCID                                              | 1    |                          |                          |         |                    | 147  |
| Non-SCID                                          | 0.81 | 0.55                     | 1.19                     | .28     |                    | 43   |
| Osteopetrosis                                     | 2.02 | 1.26                     | 3.22                     | .003    |                    | 52   |

|                                                             | HR   | 95% CI<br>Lower<br>Limit | 95% CI<br>Upper<br>Limit | P value | Overall<br>P value | N  |
|-------------------------------------------------------------|------|--------------------------|--------------------------|---------|--------------------|----|
| Mucopolysaccharidosis                                       | 2.00 | 1.41                     | 2.83                     | .0001   |                    | 42 |
| Histiocytic disorder                                        | 1.30 | 0.91                     | 1.87                     | .15     |                    | 84 |
| Others                                                      | 0.51 | 0.21                     | 1.27                     | .15     |                    | 24 |
| <b>Contrast</b>                                             |      |                          |                          |         |                    |    |
| 2005-2009 vs. 2010-2014                                     | 1.03 | 0.85                     | 1.26                     | .75     |                    |    |
| Peripheral blood vs. Umbilical cord blood                   | 0.94 | 0.74                     | 1.20                     | .63     |                    |    |
| Non-SCID vs. Osteopetrosis (< 5 months)                     | 0.29 | 0.19                     | 0.44                     | < .0001 |                    |    |
| Non-SCID vs. Mucopolysaccharidosis (< 5 months)             | 0.60 | 0.38                     | 0.95                     | .03     |                    |    |
| Non-SCID vs. Histiocytic disorder (< 5 months)              | 0.40 | 0.27                     | 0.58                     | < .0001 |                    |    |
| Non-SCID vs. Others (< 5 months)                            | 0.35 | 0.21                     | 0.59                     | < .0001 |                    |    |
| Osteopetrosis vs. Mucopolysaccharidosis (< 5 months)        | 2.10 | 1.37                     | 3.22                     | .0007   |                    |    |
| Osteopetrosis vs. Histiocytic disorder (< 5 months)         | 1.38 | 0.96                     | 1.97                     | .08     |                    |    |
| Osteopetrosis vs. Others (< 5 months)                       | 1.22 | 0.74                     | 2.0                      | .43     |                    |    |
| Mucopolysaccharidosis vs. Histiocytic disorder (< 5 months) | 0.66 | 0.45                     | 0.96                     | .03     |                    |    |
| Mucopolysaccharidosis vs. Others (< 5 months)               | 0.58 | 0.35                     | 0.97                     | .04     |                    |    |
| Histiocytic disorder vs. Others (< 5 months)                | 0.89 | 0.56                     | 1.39                     | .60     |                    |    |
| Non-SCID vs. Osteopetrosis (> 5 months)                     | 0.40 | 0.24                     | 0.68                     | .0007   |                    |    |
| Non-SCID vs. Mucopolysaccharidosis (> 5 months)             | 0.40 | 0.26                     | 0.62                     | < .0001 |                    |    |
| Non-SCID vs. Histiocytic disorder (> 5 months)              | 0.62 | 0.40                     | 0.95                     | .03     |                    |    |
| Non-SCID vs. Others (> 5 months)                            | 1.57 | 0.62                     | 4.00                     | .34     |                    |    |
| Osteopetrosis vs. Mucopolysaccharidosis (> 5 months)        | 1.01 | 0.61                     | 1.67                     | .97     |                    |    |
| Osteopetrosis vs. Histiocytic disorder (> 5 months)         | 1.55 | 0.93                     | 2.58                     | .09     |                    |    |
| Osteopetrosis vs. Others (> 5 months)                       | 3.92 | 1.48                     | 10.37                    | .006    |                    |    |
| Mucopolysaccharidosis vs. Histiocytic disorder (> 5 months) | 1.53 | 1.03                     | 2.28                     | .04     |                    |    |
| Mucopolysaccharidosis vs. Others (> 5 months)               | 3.89 | 1.55                     | 9.76                     | .004    |                    |    |
| Histiocytic disorder vs. Others (> 5 months)                | 2.54 | 1.01                     | 6.39                     | .05     |                    |    |

**eTable 7. Multivariable analysis of transplant-related mortality among malignant cohort**

|                                                                               | HR   | 95% CI<br>Lower<br>Limit | 95% CI<br>Upper<br>Limit | P value | Overall<br>P value | N   |
|-------------------------------------------------------------------------------|------|--------------------------|--------------------------|---------|--------------------|-----|
| <b>Main effect: year of transplant group</b>                                  |      |                          |                          |         | .15                |     |
| 2000-2004                                                                     | 1    |                          |                          |         |                    | 176 |
| 2005-2009                                                                     | 0.75 | 0.47                     | 1.18                     | .21     |                    | 157 |
| 2010-2014                                                                     | 0.59 | 0.33                     | 1.05                     | .07     |                    | 112 |
| <b>Age</b>                                                                    |      |                          |                          |         | .26                |     |
| < 6 months                                                                    | 1    |                          |                          |         |                    | 55  |
| > 6 months                                                                    | 0.72 | 0.41                     | 1.28                     | .26     |                    | 389 |
| <b>Malignant disease type</b>                                                 |      |                          |                          |         | .0005              |     |
| Acute myelogenous leukemia (AML)                                              | 1    |                          |                          |         |                    | 158 |
| Acute lymphoblastic leukemia (ALL) and other acute leukemias                  | 3.08 | 1.77                     | 5.34                     | .0001   |                    | 166 |
| Myelodysplastic syndrome/myeloproliferative disorder (MDS/MPD)                | 2.29 | 1.24                     | 4.26                     | .008    |                    | 103 |
| Other leukemias, CML, and other malignancies                                  | 0.87 | 0.20                     | 3.79                     | .85     |                    | 18  |
| <b>Contrast</b>                                                               |      |                          |                          |         |                    |     |
| 2005-2009 vs 2010-2014                                                        | 1.26 | 0.68                     | 2.33                     | .46     |                    |     |
| ALL and other acute leukemias vs MDS/MPD                                      | 1.34 | 0.83                     | 2.17                     | .23     |                    |     |
| ALL and other acute leukemias vs Other leukemias, CML, and other malignancies | 3.56 | 0.85                     | 14.86                    | .08     |                    |     |
| MDS/MPD vs Other leukemias, CML, and other malignancies                       | 2.65 | 0.62                     | 11.37                    | .19     |                    |     |

Abbreviations: ALL, acute lymphoblastic leukemia; AML, acute myelogenous leukemia; CML, chronic myelogenous leukemia; MDS/MPD, myelodysplastic syndrome/myeloproliferative disorder

**eTable 8. Multivariable analysis of relapse among malignant cohort**

|                                                                               | HR   | 95% CI<br>Lower<br>Limit | 95% CI<br>Upper<br>Limit | P value | Overall<br>P value | N   |
|-------------------------------------------------------------------------------|------|--------------------------|--------------------------|---------|--------------------|-----|
| <b>Main effect: Year of transplant group</b>                                  |      |                          |                          |         | .001               |     |
| 2000-2004                                                                     | 1    |                          |                          |         |                    | 173 |
| 2005-2009                                                                     | 1.32 | 0.83                     | 2.10                     | .25     |                    | 157 |
| 2010-2014                                                                     | 2.34 | 1.47                     | 3.75                     | .0004   |                    | 112 |
| <b>Age</b>                                                                    |      |                          |                          |         | .66                |     |
| < 6 months                                                                    | 1    |                          |                          |         |                    | 56  |
| > 6 months                                                                    | 0.89 | 0.51                     | 1.53                     | .66     |                    | 389 |
| <b>Malignant disease type</b>                                                 |      |                          |                          |         | .006               |     |
| Acute myelogenous leukemia (AML)                                              | 1    |                          |                          |         |                    | 158 |
| Acute lymphoblastic leukemia (ALL) and other acute leukemias                  | 0.76 | 0.49                     | 1.18                     | .22     |                    | 166 |
| Myelodysplastic syndrome/myeloproliferative disorder (MDS/MPD)                | 0.36 | 0.20                     | 0.67                     | .001    |                    | 103 |
| Other leukemias, CML, and other malignancies                                  | 0.30 | 0.07                     | 1.26                     | .10     |                    | 18  |
| <b>TBI</b>                                                                    |      |                          |                          |         | .003               |     |
| No                                                                            | 1    |                          |                          |         |                    | 356 |
| Yes                                                                           | 1.90 | 1.24                     | 2.92                     | .003    |                    | 116 |
| <b>Contrast</b>                                                               |      |                          |                          |         |                    |     |
| 2005-2009 vs 2010-2014                                                        | 0.56 | 0.36                     | 0.89                     | .01     |                    |     |
| ALL and other acute leukemias vs MDS/MPD                                      | 2.10 | 1.10                     | 4.01                     | .03     |                    |     |
| ALL and other acute leukemias vs Other leukemias, CML, and other malignancies | 2.50 | 0.59                     | 10.57                    | .21     |                    |     |
| MDS/MPD vs Other leukemias, CML, and other malignancies                       | 1.19 | 0.27                     | 5.36                     | .82     |                    |     |

Abbreviations: ALL, acute lymphoblastic leukemia; AML, acute myelogenous leukemia; CML, chronic myelogenous leukemia; MDS/MPD, myelodysplastic syndrome/myeloproliferative disorder

**eTable 9. Multivariable analysis of disease-free survival among malignant cohort**

|                                                                               | HR   | 95% CI<br>Lower<br>Limit | 95% CI<br>Upper<br>Limit | P value | Overall<br>P value | N   |
|-------------------------------------------------------------------------------|------|--------------------------|--------------------------|---------|--------------------|-----|
| <b>Main effect: Year of transplant group</b>                                  |      |                          |                          |         | .38                |     |
| 2000-2004                                                                     | 1    |                          |                          |         |                    | 176 |
| 2005-2009                                                                     | 0.98 | 0.71                     | 1.36                     | .93     |                    | 157 |
| 2010-2014                                                                     | 1.24 | 0.88                     | 1.75                     | .22     |                    | 112 |
| <b>Age</b>                                                                    |      |                          |                          |         | .26                |     |
| < 6 months                                                                    | 1    |                          |                          |         |                    | 56  |
| > 6 months                                                                    | 0.80 | 0.54                     | 1.18                     | .26     |                    | 389 |
| <b>Malignant disease type</b>                                                 |      |                          |                          |         | .001               |     |
| Acute myelogenous leukemia (AML)                                              | 1    |                          |                          |         |                    | 158 |
| Acute lymphoblastic leukemia (ALL) and other acute leukemias                  | 1.51 | 1.10                     | 2.06                     | .01     |                    | 166 |
| Myelodysplastic syndrome/myeloproliferative disorder (MDS/MPD)                | 0.83 | 0.55                     | 1.23                     | .35     |                    | 103 |
| Other leukemias, CML, and other malignancies                                  | 0.45 | 0.16                     | 1.23                     | .12     |                    | 18  |
| <b>Contrast</b>                                                               |      |                          |                          |         |                    |     |
| 2005-2009 vs 2010-2014                                                        | 0.79 | 0.55                     | 1.14                     | .21     |                    |     |
| ALL and other acute leukemias vs MDS/MPD                                      | 1.82 | 1.25                     | 2.66                     | .002    |                    |     |
| ALL and other acute leukemias vs Other leukemias, CML, and other malignancies | 3.38 | 1.23                     | 9.30                     | .02     |                    |     |
| MDS/MPD vs Other leukemias, CML, and other malignancies                       | 1.85 | 0.65                     | 5.25                     | .25     |                    |     |

Abbreviations: ALL, acute lymphoblastic leukemia; AML, acute myelogenous leukemia; CML, chronic myelogenous leukemia; MDS/MPD, myelodysplastic syndrome/myeloproliferative disorder

**eTable 10. Causes of death**

| <b>Cause of death, n (%)</b>  | <b>Malignant disease</b> | <b>Non-malignant disease</b> |
|-------------------------------|--------------------------|------------------------------|
| Primary disease               | 86 (43)                  | 64 (10)                      |
| New malignancy                | 1 (1)                    | 2 (<1)                       |
| Graft-versus-host disease     | 10 (5)                   | 34 (5)                       |
| Idiopathic pneumonia syndrome | 10 (5)                   | 41 (7)                       |
| Infection                     | 18 (9)                   | 104 (17)                     |
| Organ failure                 | 33 (17)                  | 156 (25)                     |
| Others                        | 33 (17)                  | 206 (33)                     |
| Not reported                  | 8 (4)                    | 14 (2)                       |
| Total                         | 199                      | 621                          |

**eTable 11. Breakdown of primary disease as cause of death**

| <b>Cause of death: primary disease, n (%)</b>            | <b>Malignant disease</b> | <b>Non-malignant disease</b> |
|----------------------------------------------------------|--------------------------|------------------------------|
| Acute myelogenous leukemia                               | 42 (49)                  | 0                            |
| Acute lymphoblastic leukemia                             | 30 (35)                  | 0                            |
| Other leukemia                                           | 1 (1)                    | 0                            |
| Myelodysplastic syndrome/<br>myeloproliferative disorder | 8 (9)                    | 0                            |
| Other acute leukemia                                     | 5 (6)                    | 0                            |
| Severe combined immunodeficiency (SCID)                  | 0                        | 16 (25)                      |
| Non-SCID                                                 | 0                        | 6 (9)                        |
| Osteopetrosis                                            | 0                        | 9 (14)                       |
| Mucopolysaccharidosis and other storage<br>disorders     | 0                        | 18 (28)                      |
| Histiocytic disorder                                     | 0                        | 14 (22)                      |
| Others                                                   | 0                        | 1 (2)                        |
| Total                                                    | 86                       | 64                           |

**eTable 12. Breakdown of organ failure as cause of death**

| <b>Cause of death: organ failure, n (%)</b> | <b>Malignant disease</b> | <b>Non-malignant disease</b> |
|---------------------------------------------|--------------------------|------------------------------|
| Organ failure                               | 1 (3)                    | 5 (3)                        |
| Liver failure                               | 2 (6)                    | 9 (6)                        |
| Veno-occlusive disease (SOS)                | 5 (15)                   | 26 (17)                      |
| Cardiac failure                             | 2 (6)                    | 17 (11)                      |
| Pulmonary failure                           | 10 (30)                  | 52 (33)                      |
| Central nervous system (CNS) failure        | 0                        | 3 (2)                        |
| Renal failure                               | 0                        | 2 (1)                        |
| Multiple organ failure                      | 12 (36)                  | 36 (23)                      |
| Other organ failure                         | 0                        | 4 (3)                        |
| Lymphoproliferative disorder                | 1 (3)                    | 2 (1)                        |
| Total                                       | 33                       | 156                          |

**eTable 13. Breakdown of “other” as cause of death**

| <b>Cause of death: other, n (%)</b> | <b>Malignant disease</b> | <b>Non-malignant disease</b> |
|-------------------------------------|--------------------------|------------------------------|
| Graft rejection or failure          | 1 (3)                    | 11 (5)                       |
| Hemorrhage                          | 0                        | 1 (<1)                       |
| Pulmonary                           | 3 (9)                    | 16 (8)                       |
| Intracranial                        | 1 (3)                    | 7 (3)                        |
| Gastrointestinal                    | 1 (3)                    | 3 (1)                        |
| Other hemorrhage                    | 0                        | 3 (1)                        |
| Accidental death                    | 1 (3)                    | 0                            |
| Other vascular                      | 0                        | 2 (1)                        |
| Prior malignancy                    | 2 (6)                    | 0                            |
| Other transplant-related cause      | 11 (33)                  | 52 (25)                      |
| Other cause                         | 13 (39)                  | 111 (54)                     |
| <b>Total</b>                        | <b>33</b>                | <b>206</b>                   |

**eTable 14 Cause of death in malignant vs. non-malignant split by year of transplant**

| Time period              | Malignant cohort<br>N (%) |           |           | Non-malignant cohort<br>N (%) |           |           | All<br>N (%) |
|--------------------------|---------------------------|-----------|-----------|-------------------------------|-----------|-----------|--------------|
|                          | 2000-2004                 | 2005-2009 | 2010-2014 | 2000-2004                     | 2005-2009 | 2010-2014 | All years    |
| Number of total patients | 199                       | 161       | 112       | 577                           | 699       | 750       | 2498         |
| Number of deaths         | 93                        | 62        | 44        | 227                           | 207       | 187       | 820          |
| Cause of death           |                           |           |           |                               |           |           |              |
| Primary disease          | 34 (37)                   | 30 (48)   | 22 (50)   | 26 (11)                       | 16 (8)    | 22 (12)   | 150 (18)     |
| New malignancy           | 1 (1)                     | 0         | 0         | 1 (<1)                        | 0         | 1 (<1)    | 3 (<1)       |
| GVHD                     | 7 (8)                     | 2 (3)     | 1 (2)     | 21 (9)                        | 6 (3)     | 7 (4)     | 44 (5)       |
| IPS                      | 5 (5)                     | 2 (3)     | 3 (7)     | 17 (7)                        | 14 (7)    | 10 (5)    | 51 (6)       |
| Infection                | 9 (10)                    | 6 (10)    | 3 (7)     | 46 (20)                       | 35 (17)   | 23 (12)   | 122 (15)     |
| Organ failure            | 12 (13)                   | 16 (26)   | 5 (11)    | 50 (22)                       | 72 (35)   | 34 (18)   | 189 (23)     |
| Other cause              | 18 (19)                   | 5 (8)     | 10 (23)   | 56 (25)                       | 61 (29)   | 89 (48)   | 239 (29)     |
| Not reported             | 7 (8)                     | 1 (2)     | 0         | 10 (4)                        | 3 (1)     | 1 (<1)    | 22 (3)       |

Abbreviations: GVHD, graft-versus-host-disease; IPS, idiopathic pneumonia syndrome

**eTable 15. Multivariable analysis sinusoidal obstruction syndrome in non-malignant cohort (including donor of type)**

|                                              | HR   | CI<br>Lower<br>Limit | CI<br>Upper<br>Limit | P value | Overall<br>P value | N   |
|----------------------------------------------|------|----------------------|----------------------|---------|--------------------|-----|
| <b>Main effect: Year of transplant group</b> |      |                      |                      |         | .38                |     |
| 2000-2004                                    | 1    |                      |                      |         |                    | 357 |
| 2005-2009                                    | 1.09 | 0.69                 | 1.72                 | .70     |                    | 475 |
| 2010-2014                                    | 1.36 | 0.87                 | 2.12                 | .18     |                    | 353 |
| <b>Age</b>                                   |      |                      |                      |         | .27                |     |
| < 6 months                                   | 1    |                      |                      |         |                    | 561 |
| > 6 months                                   | 1.19 | 0.87                 | 1.63                 | .27     |                    | 624 |
| <b>Conditioning regimen intensity</b>        |      |                      |                      |         | < .0001            |     |
| MAC                                          | 1    |                      |                      |         |                    | 845 |
| RIC/NMA                                      | 0.11 | 0.04                 | 0.28                 | < .0001 |                    | 242 |
| Not reported                                 | 0.05 | 0.01                 | 0.46                 | .008    |                    | 98  |
| <b>Donor Type</b>                            |      |                      |                      |         | .10                |     |
| HLA-identical sibling                        | 1    |                      |                      |         |                    | 190 |
| UCB (HLA 6/6)                                | 1.54 | 0.72                 | 3.31                 | .26     |                    | 130 |
| UCB (HLA ≤ 5/6)                              | 0.81 | 0.43                 | 1.53                 | .52     |                    | 363 |
| HLA-matched/mismatched other relative        | 1.56 | 0.97                 | 2.50                 | .06     |                    | 167 |
| HLA-matched unrelated (HLA 8/8 URD)          | 1.09 | 0.47                 | 2.50                 | .85     |                    | 157 |
| HLA-mismatched unrelated (HLA ≤ 7/8 URD)     | 1.08 | 0.42                 | 2.79                 | .87     |                    | 78  |
| Not reported                                 | 1.37 | 0.61                 | 3.10                 | .45     |                    | 100 |
| <b>Non-malignant disease type</b>            |      |                      |                      |         | .0006              |     |
| Immune deficiencies: SCID                    | 1    |                      |                      |         |                    | 531 |

|                                                                                       | HR   | CI<br>Lower<br>Limit | CI<br>Upper<br>Limit | P value | Overall<br>P value | N   |
|---------------------------------------------------------------------------------------|------|----------------------|----------------------|---------|--------------------|-----|
| Immune deficiencies: Non-SCID                                                         | 0.98 | 0.60                 | 1.60                 | .94     |                    | 196 |
| Inherited disorder of metabolism: osteopetrosis                                       | 2.60 | 1.50                 | 4.52                 | .001    |                    | 79  |
| Inherited disorder of metabolism:<br>mucopolysaccharidosis                            | 0.69 | 0.35                 | 1.36                 | .28     |                    | 138 |
| Histiocytic disorder                                                                  | 1.66 | 0.95                 | 2.88                 | .07     |                    | 188 |
| Others                                                                                | 1.57 | 0.79                 | 3.14                 | .20     |                    | 53  |
| <b>Contrast</b>                                                                       |      |                      |                      |         |                    |     |
| 2005-2009 vs 2010-2014                                                                | 0.80 | 0.52                 | 1.25                 | .33     |                    |     |
| RIC/NMA vs Not reported                                                               | 1.97 | 0.22                 | 18.06                | .55     |                    |     |
| UCB (HLA 6/6) vs UCB (HLA ≤ 5/6)                                                      | 1.90 | 1.13                 | 3.19                 | .01     |                    |     |
| UCB (HLA 6/6) vs HLA-matched/mismatched other<br>relative                             | 0.99 | 0.50                 | 1.96                 | .98     |                    |     |
| UCB (HLA 6/6) vs HLA-matched unrelated (HLA 8/8<br>URD)                               | 1.42 | 0.75                 | 2.69                 | .28     |                    |     |
| UCB (HLA 6/6) vs HLA-mismatched unrelated (HLA ≤<br>7/8 URD)                          | 1.43 | 0.63                 | 3.22                 | .39     |                    |     |
| UCB (HLA 6/6) vs Not reported                                                         | 1.13 | 0.55                 | 2.32                 | .74     |                    |     |
| UCB (HLA ≤ 5/6) vs HLA-matched/mismatched other<br>relative                           | 0.52 | 0.28                 | 0.95                 | .03     |                    |     |
| UCB (HLA ≤ 5/6) vs HLA-matched unrelated (HLA 8/8<br>URD)                             | 0.75 | 0.40                 | 1.41                 | .37     |                    |     |
| UCB (HLA ≤ 5/6) vs HLA-mismatched unrelated (HLA<br>≤ 7/8 URD)                        | 0.75 | 0.35                 | 1.63                 | .47     |                    |     |
| UCB (HLA ≤ 5/6) vs Not reported                                                       | 0.59 | 0.31                 | 1.13                 | .11     |                    |     |
| HLA-matched/mismatched other relative vs HLA-<br>matched unrelated (HLA 8/8 URD)      | 1.44 | 0.67                 | 3.10                 | .36     |                    |     |
| HLA-matched/mismatched other relative vs HLA-<br>mismatched unrelated (HLA ≤ 7/8 URD) | 1.44 | 0.62                 | 3.36                 | .39     |                    |     |
| HLA-matched/mismatched other relative vs Not<br>reported                              | 1.14 | 0.51                 | 2.52                 | .75     |                    |     |
| HLA-matched unrelated (HLA 8/8 URD) vs HLA-<br>mismatched unrelated (HLA ≤ 7/8 URD)   | 1.00 | 0.43                 | 2.37                 | .99     |                    |     |

|                                                                                                            | <b>HR</b> | <b>CI<br/>Lower<br/>Limit</b> | <b>CI<br/>Upper<br/>Limit</b> | <b>P value</b> | <b>Overall<br/>P value</b> | <b>N</b> |
|------------------------------------------------------------------------------------------------------------|-----------|-------------------------------|-------------------------------|----------------|----------------------------|----------|
| HLA-matched unrelated (HLA 8/8 URD) vs Not reported                                                        | 0.79      | 0.37                          | 1.70                          | .55            |                            |          |
| HLA-mismatched unrelated (HLA $\leq$ 7/8 URD) vs Not reported                                              | 0.79      | 0.37                          | 1.70                          | .55            |                            |          |
| Immune deficiencies: Non-SCID vs Inherited disorder of metabolism: osteopetrosis                           | 0.38      | 0.22                          | 0.65                          | .0005          |                            |          |
| Immune deficiencies: Non-SCID vs Inherited disorder of metabolism: mucopolysaccharidosis                   | 1.42      | 0.69                          | 2.92                          | .34            |                            |          |
| Immune deficiencies: Non-SCID vs Histiocytic disorder                                                      | 0.59      | 0.34                          | 1.02                          | .06            |                            |          |
| Immune deficiencies: Non-SCID vs Other                                                                     | 0.62      | 0.29                          | 1.35                          | .23            |                            |          |
| Inherited disorder of metabolism: osteopetrosis vs Inherited disorder of metabolism: mucopolysaccharidosis | 3.78      | 1.82                          | 7.81                          | .0003          |                            |          |
| Inherited disorder of metabolism: osteopetrosis vs Histiocytic disorder                                    | 1.57      | 0.90                          | 2.75                          | .12            |                            |          |
| Inherited disorder of metabolism: osteopetrosis vs Other                                                   | 1.66      | 0.83                          | 3.32                          | .15            |                            |          |
| Inherited disorder of metabolism: mucopolysaccharidosis vs Histiocytic disorder                            | 0.42      | 0.22                          | 0.78                          | .006           |                            |          |
| Inherited disorder of metabolism: mucopolysaccharidosis vs Other                                           | 0.44      | 0.19                          | 1.03                          | .06            |                            |          |
| Histiocytic disorder vs Other                                                                              | 1.06      | 0.51                          | 2.18                          | .88            |                            |          |

Abbreviations: HLA, human leukocyte antigen; MAC, myeloablative conditioning; NMA, nonmyeloablative conditioning; RIC, reduced-intensity conditioning SCID, severe combined immunodeficiency; UCB, umbilical cord blood; URD, unrelated donor

**eTable 16. Multivariable analysis sinusoidal obstruction syndrome in non-malignant cohort (including graft of source)**

|                                                         | HR   | CI Lower Limit | CI Upper Limit | P value | Overall P value | N   |
|---------------------------------------------------------|------|----------------|----------------|---------|-----------------|-----|
| <b>Main effect: Year of transplant group</b>            |      |                |                |         | .41             |     |
| 2000-2004                                               | 1    |                |                |         |                 | 356 |
| 2005-2009                                               | 1.14 | 0.74           | 1.74           | .56     |                 | 475 |
| 2010-2014                                               | 1.34 | 0.87           | 2.04           | .18     |                 | 353 |
| <b>Age</b>                                              |      |                |                |         | .25             |     |
| < 6 months                                              | 1    |                |                |         |                 | 560 |
| > 6 months                                              | 1.20 | 0.88           | 1.65           | .25     |                 | 624 |
| <b>Conditioning regimen intensity</b>                   |      |                |                |         | < .0001         |     |
| MAC                                                     | 1    |                |                |         |                 | 844 |
| RIC/NMA                                                 | 0.11 | 0.04           | 0.27           | < .0001 |                 | 242 |
| Not reported                                            | 0.06 | 0.007          | 0.45           | .007    |                 | 98  |
| <b>Graft Source</b>                                     |      |                |                |         | .22             |     |
| Bone Marrow                                             | 1    |                |                |         |                 | 469 |
| Peripheral blood                                        | 1.45 | 0.83           | 2.54           | .20     |                 | 135 |
| Umbilical cord blood                                    | 0.91 | 0.62           | 1.35           | .65     |                 | 580 |
| <b>Non-malignant disease type</b>                       |      |                |                |         | .005            |     |
| Immune deficiencies: SCID                               | 1    |                |                |         |                 | 530 |
| Immune deficiencies: Non-SCID                           | 1.01 | 0.63           | 1.63           | .95     |                 | 196 |
| Inherited disorder of metabolism: osteopetrosis         | 2.45 | 1.36           | 4.40           | .003    |                 | 79  |
| Inherited disorder of metabolism: mucopolysaccharidosis | 0.71 | 0.35           | 1.44           | .34     |                 | 138 |
| Histiocytic disorder                                    | 1.66 | 0.96           | 2.86           | .07     |                 | 188 |

|                                                                                                            | HR   | CI<br>Lower<br>Limit | CI<br>Upper<br>Limit | P value | Overall<br>P value | N  |
|------------------------------------------------------------------------------------------------------------|------|----------------------|----------------------|---------|--------------------|----|
| Others                                                                                                     | 1.55 | 0.76                 | 3.14                 | .23     |                    | 53 |
| <b>Contrast</b>                                                                                            |      |                      |                      |         |                    |    |
| 2005-2009 vs 2010-2014                                                                                     | 0.85 | 0.55                 | 1.32                 | .47     |                    |    |
| RIC/NMA vs Not reported                                                                                    | 1.83 | 0.20                 | 16.49                | .59     |                    |    |
| Peripheral blood vs. Umbilical cord blood                                                                  | 1.59 | 0.94                 | 2.66                 | .08     |                    |    |
| Immune deficiencies: Non-SCID vs Inherited disorder of metabolism: osteopetrosis                           | 0.41 | 0.24                 | 0.73                 | .002    |                    |    |
| Immune deficiencies: Non-SCID vs Inherited disorder of metabolism: mucopolysaccharidosis                   | 1.43 | 0.69                 | 2.98                 | .33     |                    |    |
| Immune deficiencies: Non-SCID vs Histiocytic disorder                                                      | 0.61 | 0.36                 | 1.03                 | .07     |                    |    |
| Immune deficiencies: Non-SCID vs Other                                                                     | 0.66 | 0.30                 | 1.41                 | .28     |                    |    |
| Inherited disorder of metabolism: osteopetrosis vs Inherited disorder of metabolism: mucopolysaccharidosis | 3.46 | 1.61                 | 7.44                 | .001    |                    |    |
| Inherited disorder of metabolism: osteopetrosis vs Histiocytic disorder                                    | 1.48 | 0.86                 | 2.53                 | .15     |                    |    |
| Inherited disorder of metabolism: osteopetrosis vs Other                                                   | 1.58 | 0.80                 | 3.13                 | .19     |                    |    |
| Inherited disorder of metabolism: mucopolysaccharidosis vs Histiocytic disorder                            | 0.43 | 0.23                 | 0.80                 | .008    |                    |    |
| Inherited disorder of metabolism: mucopolysaccharidosis vs Other                                           | 0.46 | 0.19                 | 1.11                 | .08     |                    |    |
| Histiocytic disorder vs Other                                                                              | 1.07 | 0.53                 | 2.16                 | .85     |                    |    |

Abbreviations: MAC, myeloablative conditioning; NMA, nonmyeloablative conditioning; RIC, reduced-intensity conditioning SCID, severe combined immunodeficiency;

**eTable 17. Multivariable analysis of idiopathic pneumonia syndrome in malignant cohort**

|                                              | HR   | CI Lower Limit | CI Upper Limit | P value | Overall P value | N   |
|----------------------------------------------|------|----------------|----------------|---------|-----------------|-----|
| <b>Main effect: Year of transplant group</b> |      |                |                |         | .85             |     |
| 2000-2004                                    | 1    |                |                |         |                 | 101 |
| 2005-2009                                    | 1.06 | 0.46           | 2.47           | .89     |                 | 103 |
| 2010-2014                                    | 0.74 | 0.20           | 2.68           | .64     |                 | 44  |
| <b>Age</b>                                   |      |                |                |         | .03             |     |
| < 6 months                                   | 1    |                |                |         |                 | 27  |
| > 6 months                                   | 0.36 | 0.14           | 0.92           | .03     |                 | 221 |
| <b>Contrast</b>                              |      |                |                |         |                 |     |
| 2005-2009 vs 2010-2014                       | 1.45 | 0.40           | 5.19           | .57     |                 |     |

**eTable 18. Multivariable analysis of idiopathic pneumonia syndrome in non-malignant cohort**

|                                              | HR   | CI Lower Limit | CI Upper Limit | P value | Overall P value | N   |
|----------------------------------------------|------|----------------|----------------|---------|-----------------|-----|
| <b>Main effect: Year of transplant group</b> |      |                |                |         | .59             |     |
| 2000-2004                                    | 1    |                |                |         |                 | 348 |
| 2005-2009                                    | 0.84 | 0.53           | 1.32           | .44     |                 | 471 |
| 2010-2014                                    | 0.77 | 0.46           | 1.30           | .33     |                 | 353 |
| <b>Age</b>                                   |      |                |                |         | .30             |     |
| < 6 months                                   | 1    |                |                |         |                 | 554 |
| > 6 months                                   | 1.23 | 0.83           | 1.84           | .30     |                 | 618 |
| <b>Contrast</b>                              |      |                |                |         |                 |     |
| 2005-2009 vs 2010-2014                       | 1.08 | 0.66           | 1.78           | .77     |                 |     |
